# Supplementary material for: Fumonisin B1 Accumulates in Chicken Tissues over Time and This Accumulation Was Reduced by Feeding Algo-Clay
Source: MDPI journal article supplement (doi:10.3390/toxins13100701), 2021-10-02
Supplement: s1 [file s1]

# Supplementary Materials: Fumonisin B1 Accumulates in Chicken Tissues over Time and this Accumulation Was Reduced by Feeding Algo-Clay

Julia Laurain, Didier Tardieu, Maria Matard-Mann, Maria Angeles Rodriguez and Philippe Guerre

**Table S1.** Composition of feed and nutrient contents in the experimental diets<sup>1</sup>.

| Variable                          | Control | AC    | FB   | FB+AC |
|-----------------------------------|---------|-------|------|-------|
| Corn                              | 26.9    | 26.9  | 20   | 20    |
| Corn with fumonisins <sup>2</sup> | 0       | 0     | 6.9  | 6.9   |
| Wheat                             | 29.9    | 29.9  | 29.9 | 29.9  |
| Soybean meal                      | 32.3    | 32.3  | 32.3 | 32.3  |
| Soybean seed                      | 2.5     | 2.5   | 2.5  | 2.5   |
| Soybean oil                       | 2       | 2     | 2    | 2     |
| Sodium bicarbonate                | 0.13    | 0.13  | 0.13 | 0.13  |
| Phosphate bicarbonate             | 1.78    | 1.78  | 1.78 | 1.78  |
| Carbonate                         | 0.61    | 0.61  | 0.61 | 0.61  |
| Sodium chloride                   | 0.25    | 0.25  | 0.25 | 0.25  |
| DL-Methionine                     | 1.91    | 1.91  | 1.91 | 1.91  |
| Lysine HCL                        | 0.74    | 0.74  | 0.74 | 0.74  |
| L-threonine                       | 0.58    | 0.58  | 0.58 | 0.58  |
| VHT 789NE <sup>3</sup>            | 0.4     | 0.4   | 0.4  | 0.4   |
| Intercalated algo-clay            | 0       | 0.045 | 0    | 0.045 |

<sup>1</sup>Expressed in % dry matter: FB = fumonisins B diet, AC = algo-clay diet; <sup>2</sup>Fumonisin contents were 186.5, 76.55, and 18.5 mg/kg of FB1, FB2, and FB3, respectively; <sup>3</sup>Poultry additive premix providing vitamins and trace elements.

**Table S2.** Levels of mycotoxins other than fumonisins in the experimental diets<sup>1</sup>.

| Mycotoxin               | Control | AC    | FB    | FB+AC |
|-------------------------|---------|-------|-------|-------|
| Moniliformin            | <0.1    | <0.1  | <0.1  | <0.1  |
| Zearalenone             | 0.013   | 0.013 | 0.018 | 0.01  |
| Alpha-zearalenol        | <0.01   | <0.01 | <0.01 | <0.01 |
| Beta-zearalenol         | <0.01   | <0.01 | <0.01 | <0.01 |
| Alpha-zearalanol        | <0.01   | <0.01 | <0.01 | <0.01 |
| Beta-zearalanol         | <0.01   | <0.01 | <0.01 | <0.01 |
| Deoxynivalenol (DON)    | 0.13    | 0.12  | 0.12  | 0.12  |
| DON-3-glucoside         | 0.013   | 0.008 | 0.01  | 0.01  |
| Deepoxy-DON             | <0.01   | <0.01 | <0.01 | <0.01 |
| 15 Acetyl-DON           | 0.013   | 0.013 | 0.008 | 0.008 |
| 3 Acetyl DON            | <0.01   | <0.01 | <0.01 | <0.01 |
| Fusarenon X             | <0.01   | <0.01 | <0.01 | <0.01 |
| Nivalenol               | <0.01   | <0.01 | <0.01 | <0.01 |
| Diacetoxysciperol       | <0.01   | <0.01 | <0.01 | <0.01 |
| 15 monoacetoxyscirpenol | <0.01   | <0.01 | <0.01 | <0.01 |
| T2 toxin                | <0.01   | <0.01 | <0.01 | <0.01 |

|                    |        |        |        |        |
|--------------------|--------|--------|--------|--------|
| HT2 toxin          | <0.01  | <0.01  | 0.01   | 0.01   |
| T2 tetraol         | <0.02  | <0.02  | <0.02  | <0.02  |
| T2 triol           | <0.02  | <0.02  | <0.02  | <0.02  |
| Roridin A          | <0.01  | <0.01  | <0.01  | <0.01  |
| Verrucarol         | <0.01  | <0.01  | <0.01  | <0.01  |
| Verrucaric acid    | <0.01  | <0.01  | <0.01  | <0.01  |
| Tenuazonic acid    | <0.01  | <0.01  | <0.01  | <0.01  |
| Aflatoxin B1       | <0.001 | <0.001 | <0.001 | <0.001 |
| Aflatoxin B2       | <0.001 | <0.001 | <0.001 | <0.001 |
| Aflatoxin G1       | <0.001 | <0.001 | <0.001 | <0.001 |
| Aflatoxin G2       | <0.001 | <0.001 | <0.001 | <0.001 |
| Ochratoxin A       | <0.001 | <0.001 | <0.001 | <0.001 |
| Ochratoxin alpha   | <0.005 | <0.005 | <0.005 | <0.005 |
| Ochratoxin B       | <0.001 | <0.001 | <0.001 | <0.001 |
| Verruculogen       | <0.02  | <0.02  | <0.02  | <0.02  |
| Cyclopiazonic acid | <0.05  | <0.05  | <0.05  | <0.05  |
| Citrinin           | <0.05  | <0.05  | <0.05  | <0.05  |
| Patulin            | <0.01  | <0.01  | <0.01  | <0.01  |
| Sterigmatocystin   | <0.01  | <0.01  | <0.01  | <0.01  |
| Ergocornin         | <0.01  | <0.01  | <0.01  | <0.01  |
| Ergocristin        | 0.01   | 0.015  | 0.02   | 0.013  |
| Ergocryptin        | 0.01   | <0.01  | <0.01  | <0.01  |
| Ergometrin         | <0.01  | <0.01  | <0.01  | <0.01  |
| Ergosin            | 0.013  | 0.013  | 0.018  | 0.015  |
| Ergotamin          | 0.02   | 0.013  | 0.025  | 0.025  |

<sup>1</sup> Expressed in mg/kg as the mean of 4 determinations; FB = fumonisin B diet; AC = algo-clay diet; FB+AC = fumonisin B + algo-clay diet.

**Table S3.** Allocation of feed to the different groups.

| Group        | D1 to D5 | D6 to D12 | D13 to D16 | D17 to D20 | D21       | D22       |
|--------------|----------|-----------|------------|------------|-----------|-----------|
| Control      | Control  | Control   | Control    | Control    | Slaughter |           |
|              |          |           |            | Control    | Control   | Slaughter |
| AC 4 days    | Control  | Control   | Control    | AC         | Slaughter |           |
| AC 9 days    | Control  | Control   | AC         | AC         | AC        | Slaughter |
| FB 4 days    | Control  | Control   | Control    | FB         | Slaughter |           |
| FB 9 days    | Control  | Control   | FB         | FB         | FB        | Slaughter |
| FB+AC 4 days | Control  | Control   | Control    | FB+AC      | Slaughter |           |
| FB+AC 9 days | Control  | Control   | FB+AC      | FB+AC      | FB+AC     | Slaughter |

n = 12 / group (10 + 2 spares; 6 per pen) from D1 to D10, then n = 10 per group (5 per pen) until euthanasia. FB = fumonisin B diet; AC = algo-clay diet; FB+AC = fumonisin B + algo-clay diet.

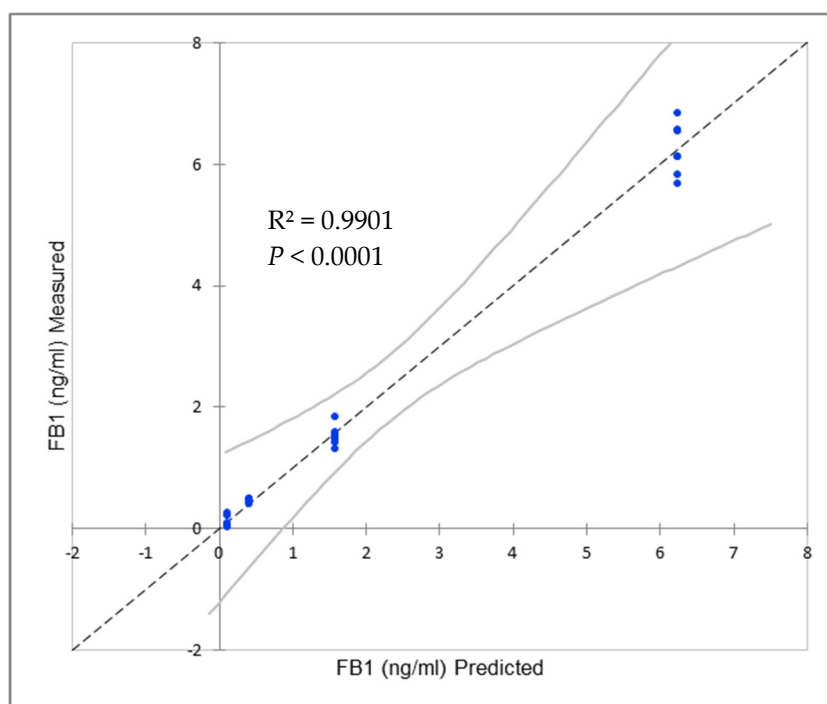

**Figure S1.** Linearity of FB1 as standard.
